# Supplementary material for: Tight junction protein ZO-2 modulates the nuclear accumulation of transcription factor TEAD
Source: PubMed Central journal article supplement — Mol Biol Cell. 2021 Jul 15;32(15):1347–58. doi: 10.1091/mbc.E20-07-0470 (PMC8694039; doi:10.1091/mbc.e20-07-0470), 2021-07-15
Supplement: mbc-32-1347-s001.pdf [file mbc-32-1347-s001.pdf]

# Supplemental Materials

*Molecular Biology of the Cell*

Gallego-Gutiérrez *et al.*

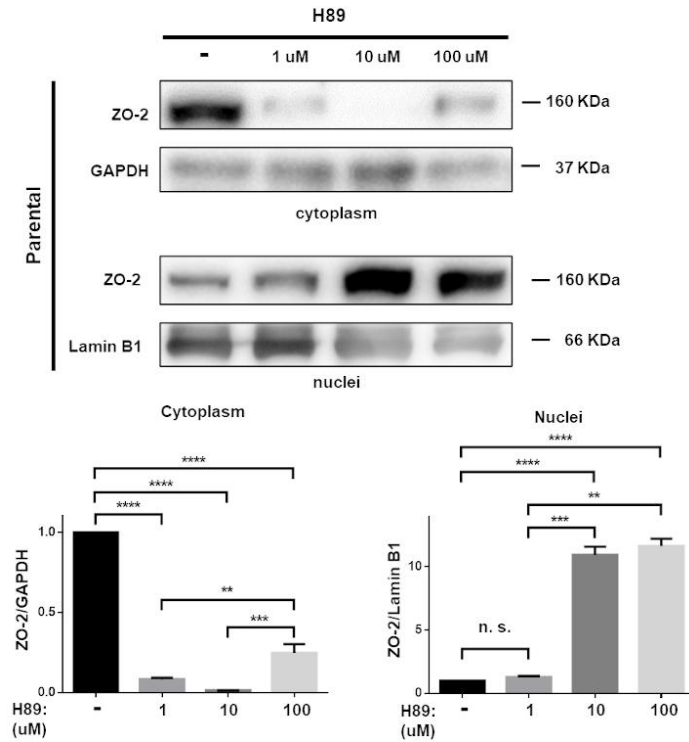

**Supplementary figure 1.- In parental cells, various doses of H89 increase the amount of nuclear ZO-2 and diminish its content in the cytoplasm.** Statistics done with One way Anova, followed by Tukey's multiple comparisons test, \*\* $p < 0.01$ , \*\*\* $p < 0.001$ ; \*\*\*\* $p < 0.0001$ . Each bar shows the mean  $\pm$  S.E.M.
